1 **Leaf-to-whole plant spread bioassay for pepper and *Ralstonia solanacearum***  
2 **interaction determines inheritance of resistance to bacterial wilt for further breeding**

3

4 Ji-Su Kwon<sup>1</sup>, Jae-Young Nam<sup>2</sup>, Seon-In Yeom<sup>1,2\*</sup>, Won-Hee Kang<sup>2\*</sup>

5

6 <sup>1</sup>Department of Horticulture, Division of Applied Life Science (BK21 four), Gyeongsang  
7 National University, Jinju, 52828, Republic of Korea

8 <sup>2</sup>Institute of Agriculture & Life Science, Gyeongsang National University, Jinju, 52828,  
9 Republic of Korea

10

11 \*Corresponding author:

12 Seon-In Yeom (sunin78@gnu.ac.kr) and Won-Hee Kang (wh81kang@gmail.com)

13

14

15 **E-mail**

16 Ji-su Kwon: jskwon422@gnu.ac.kr, Jae-Young Nam: jynam812@gmail.com, Won-Hee Kang:

17 wh81kang@gmail.com, and Seon-In Yeom: sunin78@gnu.ac.kr

18 **Abstract**

19 Bacterial wilt (BW) disease by *Ralstonia solanacearum* is a serious disease and  
20 causes severe yield losses in chili peppers worldwide. Resistant cultivar breeding is the most  
21 effective in controlling BW. Thus, a simple and reliable evaluation method is required to assess  
22 disease severity and to investigate the inheritance of resistance for further breeding programs.  
23 Here, we developed a reliable leaf-to-whole plant spread bioassay for evaluating BW disease  
24 and then, using this, determined the inheritance of resistance to *R. solanacearum* in peppers.  
25 *Capsicum annuum* 'MC4' displayed a completely resistant response with fewer disease  
26 symptoms, a low level of bacterial cell growth, and significant up-regulations of defense genes  
27 in infected leaves compared to those in susceptible 'Subicho'. We also observed the spreading  
28 of wilt symptoms from the leaves to the whole susceptible plant, which denotes the normal  
29 BW wilt symptoms, similar to the drenching method. Through this, we optimized the evaluation  
30 method of the resistance to BW. Additionally, we performed genetic analysis for resistance  
31 inheritance. The parents, F<sub>1</sub> and 90 F<sub>2</sub> progenies, were evaluated, and the two major  
32 complementary genes involved in the BW resistance trait were confirmed. These could provide  
33 an accurate evaluation to improve resistant pepper breeding efficiency against BW.

34

35 **Keywords:** *Capsicum annuum*, Bacterial wilt, *Ralstonia solanacearum*, Disease resistance,  
36 Screening method, Genetic inheritance analysis

## 37 1. Introduction

38 Chili pepper (*Capsicum spp.*) is an important economic crop that belongs to the  
39 Solanaceae family alongside potatoes, tomatoes, and eggplants. Pepper is widely consumed  
40 as fresh, dried, or processed products and provides many essential vitamins, and capsaicin is  
41 used as a major spicy source in most global cuisines [1]. The consumption of pepper has  
42 increased in the last 40 years, with production ranging from 9 to approximately 41 million tons  
43 and the cultivation area increasing from 2.4 to approximately 3.8 million ha [2]. The world trade  
44 value of hot peppers has consistently increased during the last decade, with the second-  
45 largest quantity after the tomato in Solanaceae crops [3]. Pepper production is continuously  
46 challenged by biotic stresses such as fungi, viruses, and bacteria [4]. *Ralstonia solanacearum*  
47 is the causal agent of bacterial wilt (BW), one of the most destructive soil-borne bacterial  
48 pathogens in tropical and subtropical areas, with a wide host range of more than 400 plant  
49 species, especially the Solanaceae family including peppers [5]. BW by *R. solanacearum* is  
50 widely prevalent in peppers across much of Asia [6-8]. In China, that accounts for  
51 approximately half of the world's production of peppers in 2017 (FAOSTAT), and the yield loss  
52 of BW from peppers is estimated to be approximately 20–50% in its cultivation area [9].

53 *R. solanacearum* species is divided into five races according to host range and five  
54 biovar according to the utilization of disaccharides and hexose alcohols [10]. *R. solanacearum*  
55 is also classified based on geographical origin: phylotype I from Asia, phylotype II from  
56 America, phylotype III from Africa, and phylotype IV from Indonesia [11]. Recently, a few  
57 studies have proposed to classify *R. solanacearum* into three species based on phylotype: *R.*  
58 *psedosolanacearum* (phylotype I and III), *R. solanacearum* (phylotype II), and *R. syzygii*  
59 (phylotype IV) [12, 13]. Thus, the *R. solanacearum* species complex includes phenotypically  
60 diverse and heterogeneous strains causing BW in a variable host range. This is one of the  
61 constraint factors of resistance studies on *R. solanacearum*. The pathogen can invade the

62 plant through root wounds and subsequently resides in the xylem vessels to block water  
63 transport and ultimately kills the plant host [8, 14].

64 Most studies on resistance to *R. solanacearum* in plants have used two screening  
65 methods of *R. solanacearum*, such as root cut (soil)-drench and root-dipping inoculation [15-  
66 18]. However, both methods are difficult to determine the resistance degree according to the  
67 size of artificially root wounds lead to the standard deviation is large due to low uniformity after  
68 inoculation [17]. The stem-puncture inoculation method also has limitations as it is difficult to  
69 apply this approach depending on the crop [19]. The leaf-inoculation method by syringe is a  
70 commonly used method for bacteria inoculation, but this has not yet been reported to optimize  
71 a reliable bioassay in the resistance screening to *R. solanacearum* studies in peppers. This  
72 assay can infiltrate a relatively equal quantity of *R. solanacearum* into infected leaves and  
73 evaluate the quantification of pathogen growth in a plant. Additionally, leaf infiltration can  
74 recognize the inoculated leaves and non-inoculated systemic organs and establish disease  
75 scoring according to disease transmission in the whole plant.

76 To date, developed management programs of *R. solanacearum* are not sufficiently  
77 effective because chemical and biological controls are limited and ineffective in preventing the  
78 spread of *R. solanacearum* to the host plant [20, 21]. One of the most effective BW control  
79 methods is the development of a resistance cultivar in the crops. Presently, several resistance  
80 sources of BW resistance have been evaluated to develop resistant cultivars in *Capsicum spp.*  
81 Several pepper accessions have been reported among them, *C. annuum* 'MC4', *C. annuum*  
82 'MC5', *C. annuum* 'LS2341', *C. annuum* 'PBC473', *C. annuum* 'PBC 1347', and *C. annuum*  
83 'PBC631' are well known as the most strong BW resistant cultivars in various pathogens [22-  
84 24]. BW resistance is generally quantitatively inherited and is controlled by at least two genes  
85 in the pepper cultivar *C. annuum* 'Mie-Midori' [25]. Additionally, a pepper line *C. annuum*  
86 'PM687' reported additive effects with two to five genes to control the BW resistance [26]. The  
87 pepper line *C. annuum* 'LS2341' is reportedly polygenic and linked to a major quantitative trait

88 loci (QTL) named *Bw1* on chromosome 1 [27]. Recently, a major QTL named *qRRs-10.1* in  
89 chromosome 10 was revealed as a resistance pepper line *C. annuum* 'BVRC1' [28].

90 Among them, *C. annuum* 'MC4' is a well-known accession with a strong level of  
91 resistance to various *R. solanacearum* strains [15, 22, 29, 30]. However, despite reports of *C.*  
92 *annuum* 'MC4' resistance to BW, genetic inheritance analysis of BW resistance in *C. annuum*  
93 'MC4' has not been determined yet because of pathogen strains complexity and a lack of an  
94 efficient bioassay of *R. solanacearum* in peppers. Here, we developed a fast and reliable  
95 bioassay for phenotype evaluation against *R. solanacearum* in pepper germplasms. Using this  
96 method, BW resistance and susceptible symptoms were distinctly confirmed, and we  
97 successfully detected disease symptoms through whole plant wilting and validation for pepper  
98 cultivars. Through this, a genetic inheritance analysis of BW resistance was investigated in  
99 the parents, F<sub>1</sub> and F<sub>2</sub> progeny populations. The BW resistance trait in 'MC4' confirmed to be  
100 affected with at least two major complementary genes.

## 101 **2. Results**

### 102 **2.1. Identification of leaf wilt symptoms between resistant and susceptible pepper**

103 To identify the response of pepper plants on leaf wilting by *R. solanacearum*, we  
104 performed an infiltration of *R. solanacearum* SL1931 (hereafter SL1931) with  $10^6$  CFU/mL in  
105 resistant 'MC4' and susceptible 'Subicho' to BW. We observed phenotypes of the infiltrated  
106 area for both cultivars from day 1 to day 4 after inoculation. Disease symptoms, leaf wilting,  
107 and yellowing with necrosis were observed in 'Subicho' at 3 days after inoculation (dai),  
108 whereas 'MC4' displayed no symptoms within 4 dai (Fig. 1A). To confirm the resistant response  
109 between 'MC4' and 'Subicho', we quantified the level of bacterial cell growth in both cultivars.  
110 The differences in bacterial growth were observed at 2 dai but were significant from 3 to 5 dai,  
111 displaying 10 to 100 times more bacterial growth in 'Subicho' than in 'MC4' (Fig. 1B).

112 Although no differences were observed during infection until 3 dai, the resistant  
113 response of *R. solanacearum*-inoculated leaves changed dramatically within a day between  
114 the two pepper cultivars (Fig. 1C). We measured the transcript expression of cell-death related  
115 genes, *CaHIN1*, *CaCDM*, and *CaHsr203J*, that were expressed during the resistant response  
116 with hypersensitive response (HR)-like cell death induced by various pathogens [31-33]. The  
117 expression level of the *CaHIN1* gene was significantly increased in 'MC4' than in 'Subicho' at  
118 12 h after inoculation (hai), and the *CaCDM* gene was also significant at 6 and 24 hai.  
119 Additionally, we confirmed the transcript expression levels of the *CaHsr203J* gene was  
120 significantly increased in 'MC4' than in 'Subicho' at all three-time points (Fig. 1C). Collectively,  
121 these data indicated that 'MC4' also has a suitable resistance to leaf wilting disease by *R.*  
122 *solanacearum* alongside BW disease through root infection [15].

### 123 **2.2. BW symptoms by *R. solanacearum* through leaf-to-whole plant spread bioassay** 124 **(LWB)**

125 To further understand the spectrum of defense responses to BW disease, the  
126 difference in phenotype of whole plants after leaf infection in the two cultivars was observed  
127 during 15 dai (Fig 2). 'Subicho' started to display wilt disease symptoms with the injected leaf  
128 abscising at 5 dai, whereas no differences in 'MC4' were observed until 10 dai. On the 15 dai,  
129 'MC4' had a symptom of shedding and/or yellowing only inoculated leaves while 'Subicho' had  
130 wilted and the whole plant died, which is a common BW disease symptom (Fig. 2A and 2B).  
131 We confirmed the same wilt symptoms as the soil (root)-drenching inoculation method,  
132 although the leaf infection was conducted. We also represent the wilting rate (%) data that  
133 analyzed two replicate experiments using 30 plants for each cultivar (Fig. 2C). With  
134 consistency, 'Subicho' started to wither 6 dai, and rapid wilting progressed until 10 dai, and  
135 almost all the plants died on the 15 dai. Conversely, the 'MC4' was healthy with no wilting  
136 symptoms until two weeks after inoculation. Collectively, through the LWB, we could  
137 demonstrate quantified resistance and susceptible phenotypes to BW disease (Fig. 2C).

### 138 **2.3 Development of an efficient evaluation system for resistance to *R. solanacearum* in** 139 **pepper**

140 A clear score criterion for resistant evaluation was established on the DSI from 0 to 4  
141 using LWB, which demonstrated identical BW symptoms with other methods (Fig. 3A-E) [28,  
142 34]. Additionally, we measured to closely examine the abscission of leaves in the stem after  
143 wilting (Fig. 3F-H). A score of one of the DSI represents 3rd, 4th leaf abscission that is injected  
144 leaves simultaneously, the wilt of 2 leaves stands for 25% wilt symptoms (1 score of DSI) in  
145 total 8-leaf stage (Fig. 3B, F). The DSI of 2 scores designated when three or/and four leaves  
146 wither or abscission which is a symptom of 50% wilt in 8-leaf-stage (Fig. 3C, G). The degree  
147 of more than half of the leaves wilted and a few alive is determined as DSI of 3 scores (Fig.  
148 3D, H). A plant with a DSI of < 2 was considered resistant (R),  $2 \leq$ , a DSI of < 3 was moderate  
149 resistance (MR), and susceptible (S) was defined as a DSI of  $\geq 3$  in 15 dai based on Fig. 2A  
150 and 2C results.

151           Next, to ensure the optimal evaluation for BW resistance in peppers, we determined  
152 the optimal conditions of LWB. Among the environmental conditions, temperature most affects  
153 the vitality of *R. solanacearum* that inhabits tropical and subtropical areas. Appropriate  
154 temperature conditions (28 – 32 °C) of screening for bacterial wilt have been identified in  
155 several studies on various crops and *R. solanacearum* strains [17, 35, 36]. We followed the  
156 above temperature and plant growth conditions and experimented to confirm the suitable  
157 inoculum concentration. Here, we compared four inoculum concentration levels from 10<sup>3</sup>  
158 CFU/mL to 10<sup>6</sup> CFU/mL at 10-fold intervals (Fig. 4). Differences in BW symptoms between the  
159 two cultivars can be verified at all concentrations of 10<sup>3</sup> CFU/mL to 10<sup>6</sup> CFU/mL according to  
160 statistical analysis. The DSI of 10<sup>3</sup> CFU/mL concentration scored an average 2.6 in 20 dai,  
161 which does not represent a completely susceptible phenotype, and we considered it unsuitable.  
162 In the case of 10<sup>4</sup> CFU/mL, the disease progression was similar with 10<sup>3</sup> CFU/mL until 11 dai, ,  
163 and after that disease progression was similar with 10<sup>5</sup> CFU/mL from the 15 to 20 dai. The 10<sup>6</sup>  
164 CFU/mL concentration was represented as the most suitable result. Resistance in ‘MC4’  
165 maintained a DSI score of less than 1, whereas ‘Subicho’ displayed a fast-wilting symptom  
166 that scored a mean value of 3.8 until 20 dai (Fig. 4). The 10<sup>6</sup> CFU/mL concentration displayed  
167 relatively quick and clear phenotypic differences between resistant and susceptible cultivars  
168 than others at 10 dai, and the condition was maintained until 20 dai.

169           To further confirm and validate the LWB method, 12 commercial cultivars were re-  
170 evaluated for resistance to *R. solanacearum*. The DSI of BW symptoms was checked daily  
171 according to LWB (Fig. 5 and Table 1), which displayed R, MR, and S groups. We observed  
172 that ‘PR-Daedeulbo’ and ‘Supermanidda’ wilt in most individuals scored 3.3 and 3.9,  
173 respectively, of which ‘Supermanidda’ is as susceptible as ‘Subicho’ (Fig. 5). ‘Suppermanidda’  
174 started to wilt early at 4 dai, also its disease progression is similar to ‘Subicho’, an S-control  
175 cultivar. ‘PR-Daedeulbo’ was a MR phenotype until 14 dai, but then exceeded a score of 3  
176 with over 70% of individuals dead and was thus identified as an S cultivar. By contrast, ‘PR-



177 Jangwongeunje' and 'PR-Chengyang' belonged to the resistance category with the same DSI  
178 score of 1.8 in 20 dai but did not display the resistance of 'MC4' (0.6 score). The other 8 pepper  
179 accessions were denoted MR with scores between 2.0 to 2.5, and a wilt rate (%) at  
180 approximately half of the total tested plants for each (data not presented).

181 Furthermore, on the LWB method, we compared the BW phenotype with the previous  
182 root and soil inoculation methods (Table 1). We also calculated the area under the disease  
183 progress curve (AUDPC) and relative (r) AUDPC (%) based on DSI scores at 7, 10, and 15  
184 dai. Not only the DSI for wilting evaluation, but also the rAUDPC (%) value was able to  
185 distinguish between 0–30 % R, 30–40% MR, and 40–100% as S 15 dai [15]. The AUDPC and  
186 rAUDPC (%) were distributed as 3.5 and 8.9% in 'MC4', and 'Subicho' was 38.5 and 100%,  
187 displaying significant results as controls. Of the 12 commercial pepper cultivars, the rAUDPC  
188 (%) of 'Supermanidda' (100%) and 'Muhanjilju' (20.9%) had greater results or BW  
189 susceptibility and resistance, respectively. We compared the traits with the other inoculation  
190 methods and analyzed the DSI score of the BW phenotype 15 dai when 'Subicho' was in a  
191 saturating state. The 'Gangryeokjosenggeon' (R), 'Meotjinsanai' (MR), 'PR-Daedeulbo' (S),  
192 and 'Supermanidda' (S) have the same traits in either inoculation method (Table 1). However,  
193 the traits of the root-drenching method in 'PR-Cheongyang', 'Ilsongjung', 'Muhanjilju', and PR-  
194 'Jangwongeubje' were MR or S phenotypes [15], but in this study represented all R  
195 phenotypes. 'Muhanjilju' and 'Meotjinsanai' also displayed previously different traits with S,  
196 MR, and R on infection methods and/or *R. solanacearum* strains [16], whereas we observed  
197 R and MR uniformly in each cultivar, respectively (Table 1 and Fig. 5). Even though it could be  
198 difficult to determine the exact traits to BW, our results suggested that the LWB could be a  
199 simple and reliable evaluation method for BW resistant screening in peppers.

#### 200 **2.4 Inheritance analysis of resistance to *R. solanacearum* in pepper**

201 To analyze the inheritance of resistance to *R. solanacearum* in 'MC4', the parents, F<sub>1</sub>  
202 and F<sub>2</sub>, progenies were evaluated until the disease progressed at 30 dai (Table 2 and Table

203 S2, Fig. 6). The parents, 'MC4' and 'Subicho', maintained resistance and susceptibility,  
204 respectively. The wilting progression of F<sub>1</sub> plants was conspicuously slower than in the  
205 susceptible parent, and the wilt rates of F<sub>1</sub> until 20 dai were closer to the resistant parent. In  
206 generation F<sub>2</sub>, the individuals were distributed on most DSI scores, but resistant plants were  
207 most common both at 15 and 20 dai. However, these BW symptoms in parents, F<sub>1</sub> and F<sub>2</sub>,  
208 developed continuously until the end of the experiment at 30 dai (Fig. 6 and Table 2). These  
209 results suggested that BW resistance acts as a QTL with a few genes in 'MC4'.

210 We measured the segregation ratio of BW resistance with the chi-square analysis in  
211 the F<sub>2</sub> population with disease progression. At 15 dai, segregation in F<sub>2</sub> yielded 63 resistant  
212 and 27 susceptible plants that fitted closely to a 11:5 ratio ( $P > 0.5$ ) and 3:1 ratio ( $P > 0.1$ ). It  
213 appeared more closely at an 11:5 ratio than 3:1, which demonstrated that BW resistance was  
214 predominantly controlled by at least one major factor and/or two major alleles around two  
215 weeks after inoculation. At 20 dai, resistant plants in the F<sub>2</sub> prevailed with 61 resistant plants  
216 versus 29 susceptible, which nearly matched a 9:7 ratio ( $P > 0.5$ ) and 11:5 ratio ( $P > 0.1$ ).  
217 Lastly, the segregation was represented as a 9:7 ratio ( $P > 0.05$ ) with 42 resistant plants versus  
218 48 susceptible at 30 dai (Fig. 6 and Table 3). According to these chi-square tests, there were  
219 significant differences in the segregation ration during pepper-*R. solanacearum* interaction.  
220 The BW resistance in 'MC4' may be affected by a major dominant factor until 15 dai alongside  
221 at least two factors controlling the resistance after the 20 dai. Additionally, the separation ratios  
222 of 11:5 and 9:7 were consistently represented with a high p-value closest at 20 and 30 dai,  
223 which indicated that two complementary dominant genes could mainly control the resistance  
224 to BW in 'MC4'.

225

### 226 3. Discussion

227 As global warming continues, the damage of BW is spreading beyond tropical and  
228 subtropical regions worldwide. The interaction between *R. solanacearum* and its plant hosts

229 has been studied as plant resistance to bacterial phytopathogens for more than two decades  
230 [20, 37, 38]. To study various interactions with plants, it is important to establish accurate  
231 screening. Accordingly, the inoculation method that makes good use of the infection  
232 characteristic of the bacteria was dominated since *R. solanacearum* is a soil-dwelling  
233 bacterium. Soil-drench or/and root-dipping inoculation is mostly used to investigate bacterial  
234 wilt disease progress on peppers, tomatoes, eggplants, potatoes, and the model plants  
235 *Medicago* and *Arabidopsis* [15, 35, 37, 39-41]. Using this root-infection method requires a  
236 wound of the root, however, there is uncertainty regarding the infections before the symptoms  
237 alongside difficulty in knowing the exact resistance phenotype depending on the degree of  
238 artificial root wound. Consequentially, variation and deviation of the BW symptom appear large  
239 in plants [15-18]. To overcome these problems, we developed an LWB assay for BW on  
240 peppers.

241 In this study, we confirmed the different symptoms in leaves after inoculation to  
242 discover if the method is suitable for resistant 'MC4' and susceptible 'Subicho'. Additionally,  
243 the transcript levels of defense-related genes and bacterial cell growth were significantly  
244 different in the resistant or susceptible cultivars following *R. solanacearum* infection. Although  
245 the strains and cultivars are different from our study, the result is consistent with the real-time  
246 visualization of the bioluminescent *R. solanacearum* strain BL-Rs7 colonization of grafted  
247 peppers in Du et al. (2019) that demonstrated more aggregation of the pathogen in susceptible  
248 cultivar (BVRC 1) than resistance (BVRC 25) [28]. Likewise, in our study, 'MC4' inhibited the  
249 proliferation of *R. solanacearum* and displayed a higher expression level of cell-death related  
250 genes compared with 'Subicho'. The cell-death markers used in this study have related to the  
251 resistant response and defense-related pathway [32, 42]. As a result, it can be assumed that  
252 the resistance-related factor acts for the defense as 'MC4' has a higher expression value than  
253 that of 'Subicho'. Through these results, we confirmed the 'MC4' was a clear BW resistance  
254 cultivar compared with 'Subicho'. According to the study of Akinori et al. (2007), the same BW  
255 phenotype was also represented in tobacco when leaf-infiltration and root-inoculation were

256 performed, similar to our studies [43]. The leaf-infiltration method is more useful to elucidate  
257 molecular events than root (soil)-drenching to better understand the interaction between plants  
258 and pathogens since it is possible to inoculate equally [43-45]. In conclusion, the wilting  
259 symptoms appeared on the whole plant even when inoculated to the leaves, which was  
260 confirmed the same symptoms as the root infection.

261 The temperature is the main environmental factor in which *R. solanacearum* affects  
262 crops [46, 47]. An experiment was conducted to confirm the most suitable temperature  
263 conditions for LWB before the inoculum concentration experiment. As a result of our  
264 experiments at 25 °C, 28 °C, and 32°C, two suitable temperatures were revealed except for  
265 25 °C (data not shown). Additionally, the studies derived that the temperature of 25 °C was  
266 not suitable for peppers and tomatoes, respectively, in the screening research for optimization  
267 condition [15, 35]. Therefore, the temperature was fixed at 28–30 °C in the experimental  
268 conditions, and the inoculum concentrations were tested to identify the most suitable for the  
269 LWB. The most appropriate concentration was 10<sup>6</sup> CFU/mL indicating that it was sufficiently  
270 able to confirm the phenotypic difference between two control cultivars with a lower  
271 concentration and less volume than the drenching method.

272 We executed the LWB in eleven commercial pepper cultivars with BW phenotype  
273 information and one commercial pepper cultivar with no information. As a result, five and two  
274 cultivars represented R-phenotype and S-phenotype, respectively, and the others were the  
275 MR-phenotype. Among them, the cultivars of ‘Muhanjilju’, ‘PR-Jangwongeubje’, and ‘PR-  
276 Gukgadeapyo’ demonstrated susceptibility in Hwang et al. (2017), but our results  
277 demonstrated the resistance of BW phenotypes, which is an opposite result. These results  
278 could affect the metabolic activity of the host due to artificial wounds in the root, making it  
279 difficult to identify the accurate BW phenotype. In case of ‘Muhanjilju’ was represented R, MR,  
280 and S-phenotypes according to inoculation with various *R. solanacearum* strains in Lee et al.  
281 (2018) [16]. Additionally, the ‘Subicho’ was inoculated by soil-drenching without root wounds

282 and represented 0.7 DSI scores (0 to 4 scale scores) with very low disease incidence 15 dai  
283 [15], in which the BW phenotype is dependent on the root wound in pepper. For this reason,  
284 the study of interactions with pepper-*R. solanacearum* is exceptionally difficult. An accurate  
285 and reliable bioassay (LWB) can identify the exact BW phenotype in pepper through the equal  
286 inoculate without any wound of the root.

287           One of the most effective control managements is developing a resistance cultivar in  
288 the crops by integrating a resistance gene. Until now, a few sources of BW resistance have  
289 been reported in *Capsicum* spp. including *C. annuum* 'MC4', 'MC5', 'LS2341', and 'PBC631'  
290 [22-24]. In previous studies on the resource of resistance to BW, different QTL studies for only  
291 a few were determined that a major QTL (*qRRs-10.1*) in 'BVRC1' accession and one major  
292 (*Bw1*) in 'LS2341' accession were identified at different chromosome 10 and 1 for each  
293 resource, respectively [27, 28]. Despite the above reports of resistance to bacterial wilt, there  
294 are no useful cultivars comprised of high resistance with good yield and desirable agronomic  
295 traits. In this regard, understanding the genetic control for resistance to BW disease in plant  
296 breeding programs is essential and required to increase their efficiency, especially for planning  
297 a proper breeding method [48, 49].

298           'MC4' is well-known to have high-level resistance to the species of the *R.*  
299 *solanacearum* complex [22, 24, 29], but the genetic inheritance of 'MC4' for BW resistance  
300 has not been identified yet. In this study, we constructed the F<sub>2</sub> population with 'Subicho'  
301 (susceptible) and performed an analysis of the inheritance of BW resistance through the LWB.  
302 We identified BW resistance was dominant over susceptible, and at least two pairs of genes  
303 appeared to control the trait in a complementary manner. Matsunaga et al. (1998) studied the  
304 mode of inheritance of BW resistance by crossing the resistant sweet pepper cultivar 'Mie-  
305 Midori' with the susceptible 'AC2258' and found that bacterial wilt resistance demonstrates  
306 incomplete dominance, and at least two genes were involved in resistance [25]. This result is  
307 similar to our segregation ratio data representing two major genes affected in the BW

308 resistance of 'MC4' in this study. Additionally, Denis et al. (2005) concluded that two to five  
309 genes with additive effects were estimated to control the resistance. Tran et al. (2010) reported  
310 various dominance genetic effects as polygenic or oligogenic for *R. solanacearum* using 6  
311 resistant pepper lines and 5 susceptible pepper lines [50]. Recently, Heshan et al. (2019)  
312 represented the disease index and wilt rate (%) using the F<sub>2</sub> plants (n = 440), in which the  
313 wilting pattern of segregation was similar to our result [28]. Especially, the disease symptoms  
314 kept progressing over time alongside no represented complete dominance resistance like  
315 'MC4' (R-parent). In the F<sub>1</sub> and F<sub>2</sub> generation, and which indicated to appear epistasis  
316 dominant like our result. These studies indicated that the inheritance of BW resistance is  
317 complicated, and a minimum of two genes interact to express resistance traits in the pepper  
318 germplasm. Our data suggest that the LWB method may determine a more exact BW  
319 resistance phenotype of pepper germplasms and reveal the interaction of plant-pathogens at  
320 the molecular level. Further investigations of inheritance factors could provide insights into  
321 QTL analysis and the development of BW resistance-related molecular markers.

322

#### 323 **4. Materials and Methods**

##### 324 **4.1 Plant materials and growth conditions**

325 Two varieties of peppers, *Capsicum annuum* 'MC4' with resistance to *R.*  
326 *solanacearum* and *C. annuum* 'Subicho' with susceptibility to *R. solanacearum*, were provided  
327 by Dr. Seon-Woo Lee (Dong-A University, Korea). The 12 commercial pepper cultivars (5  
328 resistant, 5 moderately resistant, and 2 susceptible cultivars; Table 1) were used. The 'MC4'  
329 was crossed with 'Subicho' to get F<sub>1</sub> plants. The F<sub>2</sub> population was obtained by self-pollination  
330 of F<sub>1</sub> plants. The pepper plants were kept in a growth chamber at 29 ± 1 °C under a 16 h light  
331 /8 h dark cycle with 50% humidity for 3–4 weeks. We inoculated *R. solanacearum* onto the 3rd  
332 and 4th leaves of fully expanded four-leaf-stage on pepper plants.

## 333 **4.2 Bacteria inoculation and quantification**

334           The strain *R. solanacearum* SL1931 (race1, phylotype I) was obtained from Dr. Seon-  
335 Woo Lee (Dong-A University, Korea). Bacterial cells were streaked and grown on Kelman's  
336 tetrazolium chloride gar medium and maintained at 28 °C for 48-h. A single fluidal colony of *R.*  
337 *solanacearum* was grown on CPG broth and shaken at 250 rpm at 28 °C for 24-h. A bacterial  
338 culture suspension was diluted with distilled water to adjust the concentration to 10<sup>8</sup> CFU/mL  
339 (OD<sub>600</sub> = 0.3) [15]. Ten-fold serial dilutions of bacteria from 10<sup>3</sup> CFU/mL to 10<sup>6</sup> CFU/mL per leaf  
340 were used for inoculation. Seedlings at fully expanded four-leaf-stage were inoculated with  
341 0.1 mL bacteria/leaf using a needleless syringe. Disease symptoms were observed under  
342 controlled conditions of 29 ± 1 °C under 16-h of light a day with 50% humidity for 20 days. The  
343 leaf-inoculation assay was performed with three independent tests, and each consisted of at  
344 least 8 plants per cultivar. Inoculum concentration was performed with 10<sup>6</sup> CFU/mL per leaf  
345 for the inheritance analysis of the F<sub>2</sub> population.

346           Bacterial quantification was performed like below with modification described by Yi et  
347 al. (2009) [51]. To determine in planta bacterial growth, pepper plants (*C. annuum* 'MC4' and  
348 'Subicho') were leaf-inoculated with bacterial suspensions (1 x 10<sup>4</sup> CFU/mL). Inoculated  
349 leaves were harvested at various time points for further analysis. Two independent assays  
350 were performed, which consisted of 6–8 samples for each time point in an experiment.  
351 Bacterial growth was measured by grinding inoculated samples in distilled water, plating  
352 serially diluted tissue samples with two replicates on CPG agar with 0.1% gentamicin (v/v),  
353 and counting colony-forming units.

## 354 **4.3 Disease evaluation and data analysis**

355           Disease evaluations were assessed daily after inoculation with *R. solanacearum* as  
356 described below. The disease severity index (DSI) of individual inoculated plants was rated on  
357 a scale of 0 to 4 as five phases in which 0 is no wilt disease symptoms observed; 1 is minor

358 symptoms with less than 25% wilted leaves; 2 is moderate symptoms with 25–50% wilted  
359 leaves; 3 is severe symptoms with 50–75% wilted leaves; 4 is 75–100% wilted leaves or dead  
360 plant. The area under the disease progress curve (AUDPC) was calculated during the disease  
361 observation (0 to 15 dai) with a DSI value. [52]. Wilting rate (%) was calculated [The number  
362 of wilt plant / the number of total plants] x 100. The differences between the mean values of  
363 disease scores of the pepper cultivars were analyzed using Duncan's multiple range tests,  
364 and  $p < 0.05$  was considered a significant difference. Statistical analysis used SAS (SAS 9.1,  
365 SAS Institute Inc., Cary, NC, USA).

#### 366 **4.4 Quantitative RT-PCR of defense related genes**

367 Total RNA was extracted from pepper leaves inoculated with the pathogen using the  
368 Trizol reagent (Invitrogen, Carlsbad, USA), and 2 ug of total RNA were reverse transcribed  
369 using Superscript IV (Invitrogen, Carlsbad, USA). To confirm the plant response against *R.*  
370 *solanacearum* infection, quantitative RT-PCR was performed using the defense-related genes  
371 (Supplementary Table S1) [32]. The following cycling conditions were used: 1 cycle of 94 °C  
372 for 3 min; 28 cycles or 30 cycles of 95 °C for 30 s, 58 °C for 30 s and 72 °C for 30 s; 72 °C for  
373 5 min. The actin gene (designated *CaACT*) was used as an endogenous control to normalize  
374 the expression levels. Expression levels were reported as three replicates as mean values  
375 with standard errors.

376

#### 377 **5. Conclusions**

378 Breeding a resistant cultivar is most effective in controlling bacterial wilt that causes  
379 serious yield losses in peppers worldwide. An accurate and reliable evaluation method is  
380 necessary to evaluate disease severity and reveal the genetic inheritance for BW resistance.  
381 We established a simple LWB to evaluate BW disease and then, using this, analyzed the  
382 inheritance of BW resistance through a 'Subicho' x 'MC4' F<sub>2</sub> population. The BW resistance



383 response of 'MC4' represents lower disease symptoms in leaves than susceptible 'Subicho',  
384 and we observed the spreading of wilt symptoms from leaves to a whole susceptible plant,  
385 similar to the drenching method. As a result, we optimized the evaluation method of resistance  
386 to BW with 12 commercial pepper cultivars. Using LWB, we confirmed the two major  
387 complementary genes related to the BW resistance trait through the analyzed genetic  
388 inheritance in 90 F<sub>2</sub> progenies. This bioassay could promote an accurate evaluation of BW  
389 disease phenotype, and the two inheritance factors of 'MC4' could provide useful information  
390 for further QTL analysis in pepper breeding.

391 **Supplementary Materials**

392 Supplementary Table S1. Primer information used for RT-PCR analysis of defense-related  
393 gene expression in this study. Supplementary Table S2. Disease evaluation design and the  
394 number of plants to parents and their progenies based on disease severity index in 15, 20,  
395 and 30 dai *against R. solanacearum* SL1931 strain.

396 **Funding:** This research was supported by the Basic Science Research Program through the  
397 National Research Foundation of Korea (NRF) funded by the Korean Government (NRF-  
398 2017R1E1A1A01072843, 2015R1A6A1A03031413 and 2019R1C1C1007472). J.-S.K. were  
399 supported by a scholarship from the BK21 four Program from the Ministry of Education.

400 **Acknowledgments:** We are grateful to Dr. Seon-Woo Lee (Dong-A University, Korea) for  
401 providing pepper seeds and bacterial strain.

402 **Author contributions:** J.-S.K. performed the experiments, data analysis and wrote the  
403 manuscript. J.-Y.N. collected samples and data analysis. W.-H.K. and S.-I.Y. conceived and  
404 designed the experiments, organized and wrote the manuscript, and supervised the project.

405 **Institutional Review Board Statement:** Not applicable.

406 **Informed Consent Statement:** Not applicable.

407 **Conflicts of Interest:** The authors declare no conflict of interest.

408 **Table 1.** BW phenotype of LWB in 12 commercial chili pepper cultivars to *R. solanacearum*

| Cultivar                   | In this study (LWB)    |     |     |     |                     |                         |                        | Previous study                                      |
|----------------------------|------------------------|-----|-----|-----|---------------------|-------------------------|------------------------|-----------------------------------------------------|
|                            | Days after inoculation |     |     |     | AUDPC <sup>b</sup>  | rAUDPC (%) <sup>c</sup> | Phenotype <sup>d</sup> | Root-drench phenotype <sup>e,f</sup>                |
|                            | 0                      | 7   | 10  | 15  |                     |                         |                        |                                                     |
| <b>Gangryeokjosenggeon</b> | 0 <sup>a</sup>         | 0.3 | 1.0 | 1.8 | 9.4 bc <sup>g</sup> | 24.1                    | R                      | R <sup>e</sup>                                      |
| <b>PR Cheongyang</b>       | 0                      | 0.3 | 1.2 | 1.6 | 9.7 bc              | 24.9                    | R                      | MR <sup>e</sup>                                     |
| <b>Ilsongjung</b>          | 0                      | 0.1 | 0.8 | 1.9 | 8.3 c               | 21.3                    | R                      | MR <sup>e</sup>                                     |
| <b>PR Jangwongeubje</b>    | 0                      | 0.3 | 1.0 | 1.8 | 10.2 bc             | 26.0                    | R                      | S <sup>e</sup>                                      |
| <b>Muhanjilju</b>          | 0                      | 0.1 | 1.0 | 1.6 | 8.2 c               | 20.9                    | R                      | S <sup>e,f</sup> / MR <sup>f</sup> / R <sup>f</sup> |
| <b>Dokyachungchung</b>     | 0                      | 0.4 | 1.4 | 2.0 | 12.5 bc             | 32.0                    | MR                     | R <sup>e</sup>                                      |
| <b>Meotjinsanai</b>        | 0                      | 0.5 | 1.4 | 2.2 | 13.4 bc             | 34.2                    | MR                     | MR <sup>f</sup> / R <sup>f</sup>                    |
| <b>Nokgwang</b>            | 0                      | 0.5 | 1.3 | 2.0 | 12.5 bc             | 32.0                    | MR                     | -                                                   |
| <b>PR Gukgadeapyo</b>      | 0                      | 0.7 | 1.6 | 2.1 | 15.3 b              | 39.3                    | MR                     | S <sup>e</sup>                                      |
| <b>Yeokganghongjanggun</b> | 0                      | 0.4 | 1.2 | 2.3 | 12.0 bc             | 30.4                    | MR                     | S <sup>e</sup>                                      |
| <b>PR Daedeulbo</b>        | 0                      | 0.3 | 1.7 | 3.1 | 15.6 b              | 40.0                    | S                      | S <sup>e</sup>                                      |
| <b>Supermanidda</b>        | 0                      | 2.9 | 3.7 | 3.9 | 39.0 a              | 100                     | S                      | S <sup>e</sup>                                      |
| <b>'MC4'</b>               | 0                      | 0.1 | 0.4 | 0.6 | 3.5 d               | 8.9                     | R                      | R <sup>e</sup>                                      |
| <b>'Subicho'</b>           | 0                      | 2.6 | 3.9 | 4.0 | 38.5 a              | 98.7                    | S                      | S <sup>e</sup>                                      |

409 <sup>a</sup> Disease severity index (DSI) was represented 0 to 4 rating scale.

410 <sup>b</sup> The AUDPC was calculated based on DSI scores evaluated at 0, 7, 10 and 15 days after inoculation  
411 (dai).

412 <sup>c</sup> Relative (r) AUDPC (%) of each cultivar to AUDPC of the 'Suppermanidda' that is most the susceptible  
413 cultivar.

414 <sup>d</sup> DSI of < 2 is considered resistant, 2 ≤ DSI < 3 is moderately resistant and susceptible was defined  
415 with DSI of ≥ 3. Each data point represents the mean DSI from three independent experiments. A total  
416 of 30 plants were analyzed for each cultivar.

417 <sup>e</sup> Root-cut drench method by Hwang et al. (2017).

418 <sup>f</sup> Root-dipping method by Lee et al. (2018).

419 <sup>g</sup> Each value represents the mean disease index of values in the labeled with the same letter

420 with each column are not significantly different in Duncan's multiple range test at  $P < 0.05$ .

421 **Table 2.** Disease evaluation design and the number of plants to parents and their progenies based on disease severity index in 20 dai against *R. solanacearum*  
 422 SL1931 strain.

| Population <sup>a</sup> | No. of Plants | Disease severity index |    |    |   |    | Mean of DSI <sup>b</sup> | Wilt rate (%) <sup>c</sup> | AUDPC <sup>d</sup> |
|-------------------------|---------------|------------------------|----|----|---|----|--------------------------|----------------------------|--------------------|
|                         |               | 0                      | 1  | 2  | 3 | 4  |                          |                            |                    |
| MC4                     | 30            | 6                      | 24 | 0  | 0 | 0  | 0.8                      | 0                          | 7.5                |
| Subicho                 | 30            | 0                      | 0  | 0  | 0 | 30 | 4.0                      | 100                        | 50.3               |
| F <sub>1</sub>          | 30            | 0                      | 12 | 4  | 0 | 14 | 2.5                      | 46.7                       | 22.7               |
| F <sub>2</sub>          | 90            | 0                      | 44 | 11 | 1 | 34 | 2.3                      | 38.8                       | 21.9               |

423 <sup>a</sup> 'MC4' and 'Subicho' is resistance (R) and susceptible (S) parent line, respectively. The F<sub>1</sub> population crossed 'Subicho' (S) x 'MC4' (R) and F<sub>2</sub> population  
 424 derived from self-cross of F<sub>1</sub> plants. <sup>b</sup> The disease severity index (DSI) was calculated at 15 days after inoculation based on a 0 to 4 rating scale. <sup>c</sup> Wilting was  
 425 defined as DSI at 20 dai of  $\geq 3$ . <sup>d</sup> The area under the disease progress curve (AUDPC) was calculated from scores (0-4) evaluated at 0, 7, 10, 15 and 20 dai.

426 **Table 3.** Segregation of *R. solanacearum* SL1931 resistance in F<sub>2</sub> population at 15, 20, and 30 dai

| DAI | Chi-square value <sup>a</sup> |                    |       |       |                    |       |        |       |       |         |         |
|-----|-------------------------------|--------------------|-------|-------|--------------------|-------|--------|-------|-------|---------|---------|
|     | 3:1                           | 9:7                | 15:1  | 3:13  | 11:5               | 9:6:1 | 12:3:1 | 9:3:4 | 7:6:3 | 9:3:3:1 | 3:6:3:4 |
| 15  | 1.2 <sup>**</sup>             | 6.9                | 86.6  | 155.2 | 0.1 <sup>***</sup> | 111.0 | 93.47  | 14.0  | 44.90 | 55.7    | 144.3   |
| 20  | 9.3                           | 0.9 <sup>***</sup> | 163.6 | 106.0 | 2.4 <sup>**</sup>  | 169.6 | 163.6  | 9.9   | 35.4  | 161.0   | 79.8    |
| 30  | 38.5                          | 3.4 <sup>*</sup>   | 340.5 | 46.0  | 20.4               | 383.2 | 386.8  | 79.6  | 110.1 | 208.7   | 51.1    |

427 <sup>a</sup> P value indicate according to \* P > 0.05, \*\*P > 0.1, \*\*\* P > 0.5.

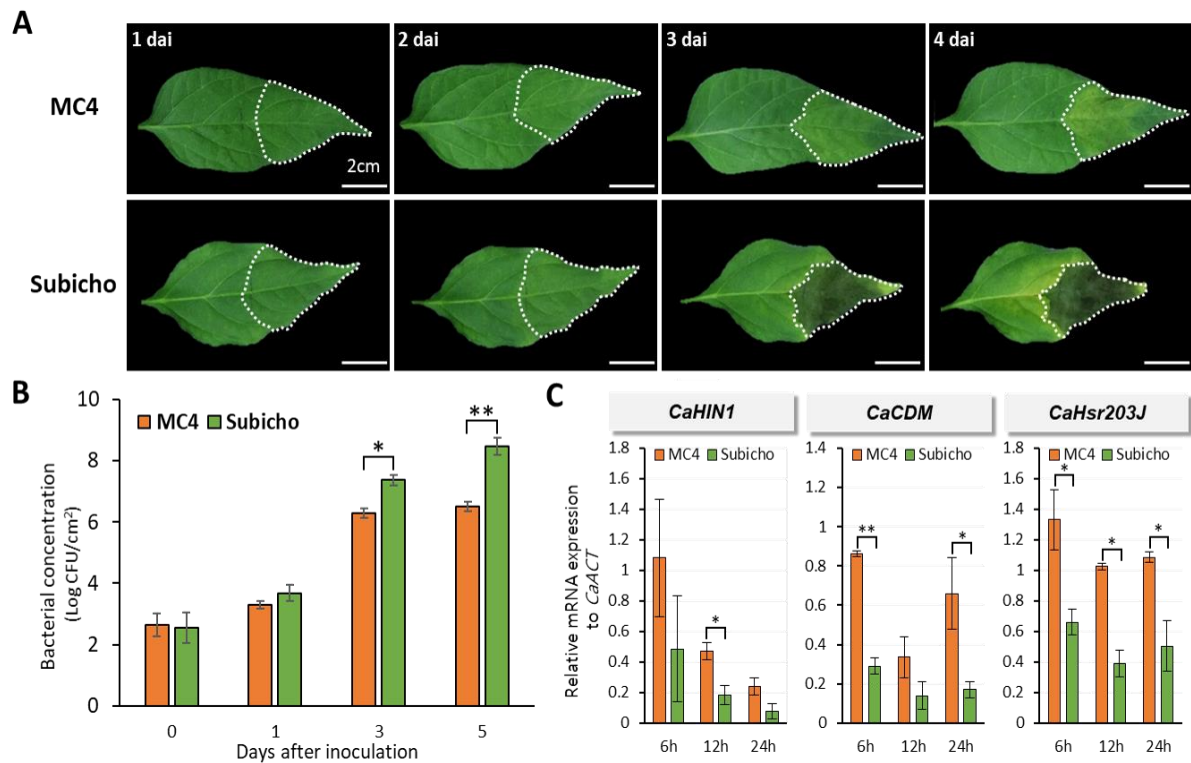

428 **Figure 1.** Assessment of BW response by *R. solanacearum* in pepper leaves. The eight-leaf  
 429 stage seedlings were inoculated with *R. solanacearum* SL1931 by leaf infiltration with bacterial  
 430 suspensions  $1 \times 10^6$  CFU/mL to give inoculum volume of 0.1mL per leaf. The plants were  
 431 incubated in a growth room at 28°C with 16-hour light a day. (A), Difference of necrotic lesions  
 432 present in the leaf of inoculated 'MC4' and 'Subicho'. The symptom of 'MC4' (R) and 'Subicho'  
 433 (S) leaf according to 1, 2, 3 and 4 days after inoculation (dai) is shown. (B) Bacterial  
 434 multiplication in the apoplast of 'MC4' and 'Subicho' leaves. Bacterial suspension is  $1 \times$   
 435  $10^4$  CFU/mL to give inoculum volume of 0.1 mL/leaf. Total six to eight leaves used one  
 436 experiment. Each vertical bar represents the S.E from two independent experiment. (C)  
 437 Reverse-transcription polymerase chain reaction of defense-related expression gene  
 438 colonization levels in 'MC4' and 'Subicho' against *R. solanacearum*. A graph represent the  
 439 difference of relative expression in 'MC4' (R), 'Subicho' (S) leaves according to cell death  
 440 marker in 6h and 12h after inoculation. Asterisks indicate statistically significant differences in  
 441 5 dai according to Student's t-test (\* $p < 0.05$ , \*\* $p < 0.01$ ).

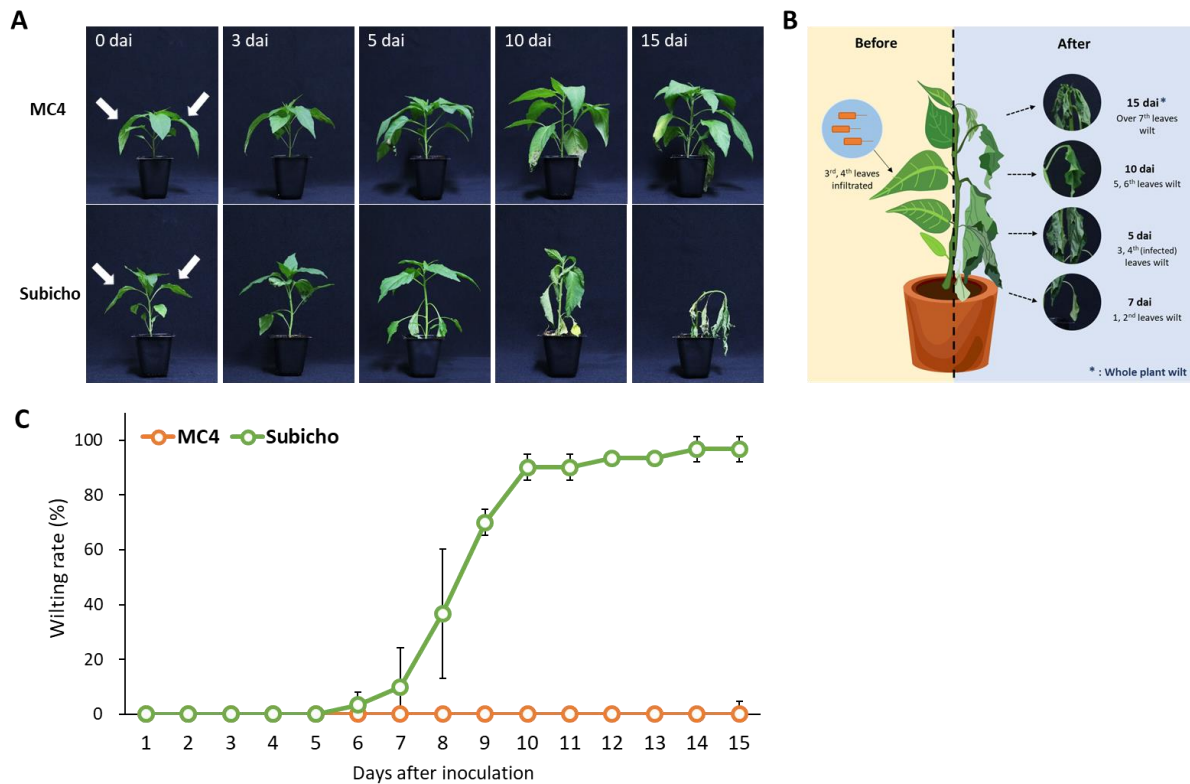

442 **Figure 2.** The difference in disease symptoms of leaf to whole plant spread bioassay (LWB)  
 443 in pepper. Three week after transplanting, the eight-leaf stage seedlings were inoculated with  
 444 *R. solanacearum* SL1931 by leaf infiltration with bacterial suspensions  $1 \times 10^6$  CFU/mL to give  
 445 inoculum volume of 0.1 mL/leaf. (A), Difference of bacterial wilt (BW) symptom progression in  
 446 inoculated 'MC4' and 'Subicho'. The phenotype of 'MC4' (R), 'Subicho' (S) according to 0, 3,  
 447 5, 10 and 15 dai is shown. (B), Illustration of a procedure in which the whole plant withers after  
 448 leaf-infiltration. (C), Progress degree of wilt disease on 'MC4' and 'Subicho'. Disease severity  
 449 of the plants was investigated every day after leaf inoculation. Green and Orange lines indicate  
 450 'Subicho' and 'MC4'. In total, 30 plants were analyzed for each cultivar. The arrows show  
 451 inoculated leaves. Each data point represents the mean disease index for two independent  
 452 experiment.



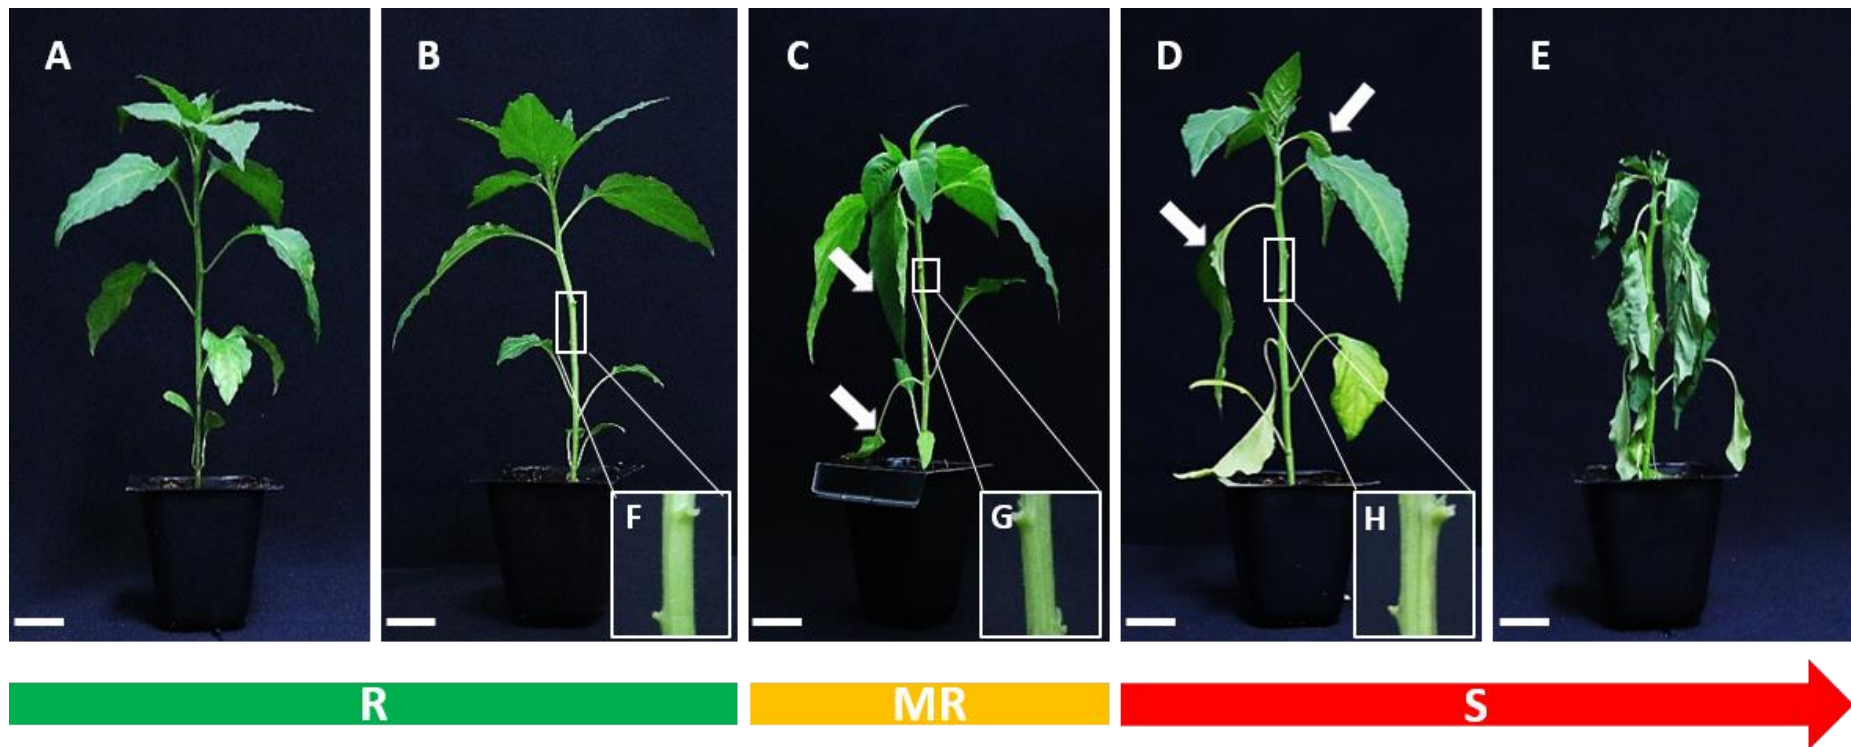

453 **Figure 3.** The disease symptoms scale ranging from 0 to 4 for BW evaluation. The (A) to (E), photo represent 0 (no symptoms) to 4 (complete  
 454 wilting) wilt symptoms stages. The BW phenotype of three stages denoted resistance with a green bar, moderate resistance with a yellow bar,  
 455 and susceptible with a red bar. The white arrows indicate wilt and abscission leaves. The white under bar signifies 2cm.

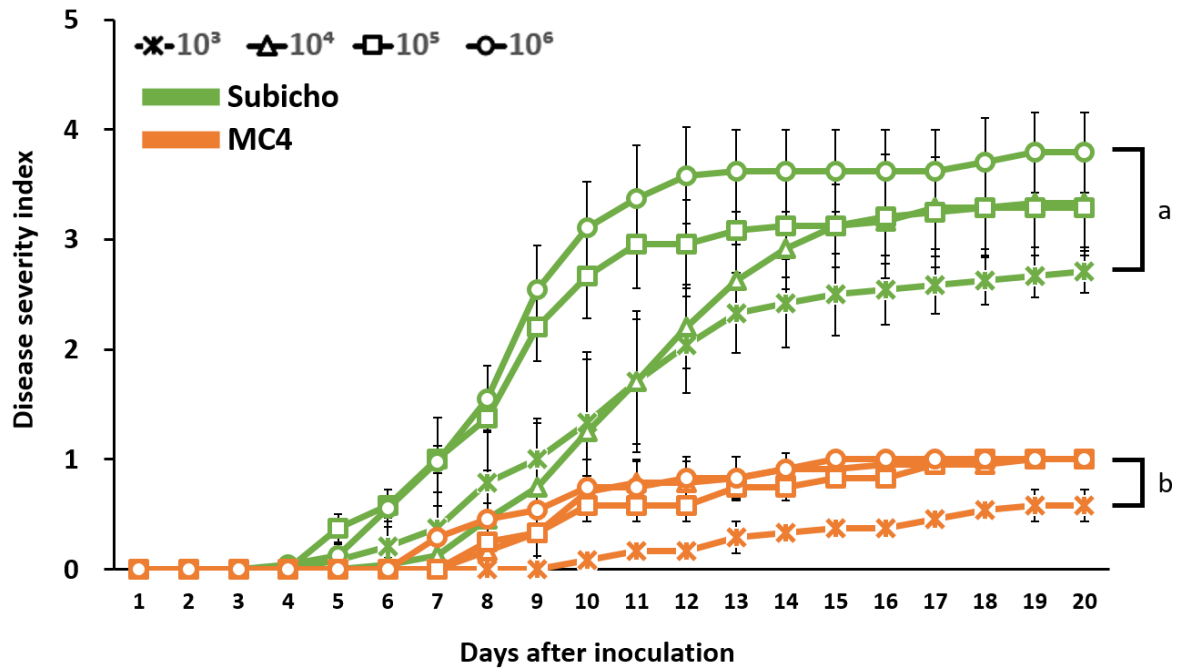

456 **Figure 4.** Occurrence of bacterial wilt on seedling of two pepper cultivars according to  
457 inoculum concentration. Three week after transplanting, the eight-leaf stage seedlings were  
458 inoculated with *R. solanacearum* SL1931 with bacterial suspensions ( $1 \times 10^3$ ,  $1 \times 10^4$ ,  $1 \times 10^5$   
459 and  $1 \times 10^6$  CFU/mL) to give inoculum volume of 0.1 mL/leaf. Disease severity of the plants  
460 was investigated every day after inoculation. Green and Orange lines indicate 'Subicho' and  
461 'MC4'. Each bar represents the S.E from three independent experiment with 24 plants. Values  
462 in the labeled with the same letter within each inoculum concentration are not significantly  
463 different in Duncan's multiple range test at  $P = 0.05$ .

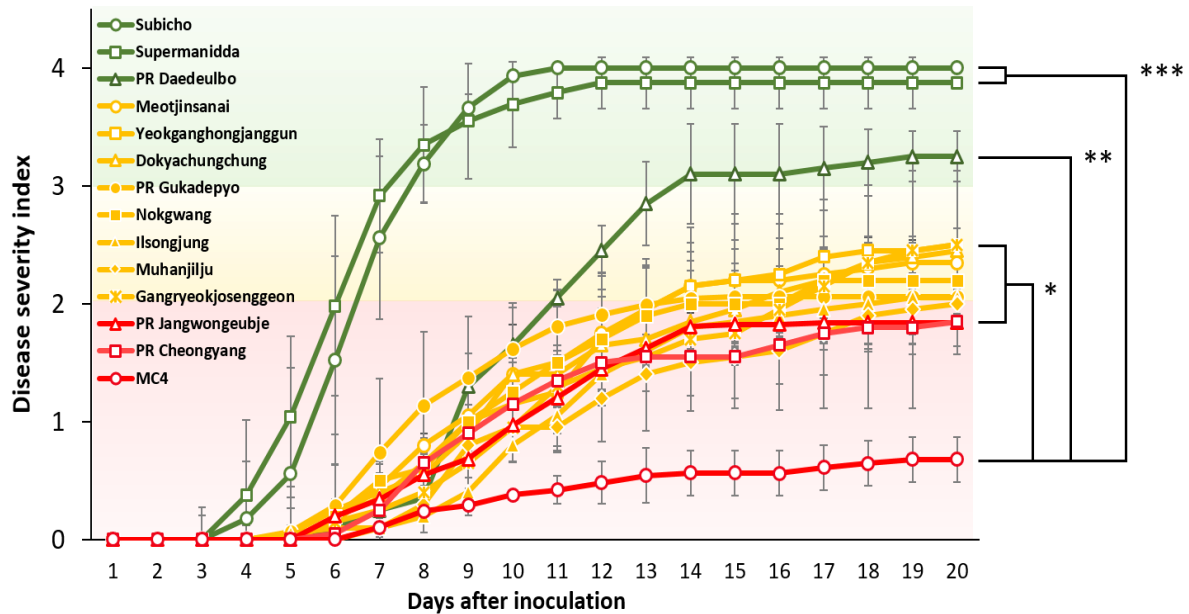

464 **Figure 5.** Disease progression through leaf to whole plant spread bioassay (LWB) in 12  
 465 pepper accessions. The eight-leaf stage seedlings were inoculated with *R. solanacearum*  
 466 SL1931 with bacterial suspensions  $1 \times 10^6$  CFU/mL to give inoculum volume of 0.1 mL/leaf.  
 467 A line graph area of red, yellow and green indicated resistance (R), moderate resistance (MR),  
 468 susceptible (S) and, the color of line was expressed the same as the areas based on the DSI  
 469 score of the bacterial wilt on 20 dai for each cultivar. Each data point represents the mean  
 470 disease index from at least two independent experiments. Each bar represents the S.E from  
 471 three independent experiment with 24 plants. Asterisks indicate statistically significant  
 472 differences ( $*p < 0.05$ ,  $**p < 0.01$ ,  $***p < 0.001$ ) in AUDPC (0 to 15d) according to Student's t-  
 473 test with 'MC4'.

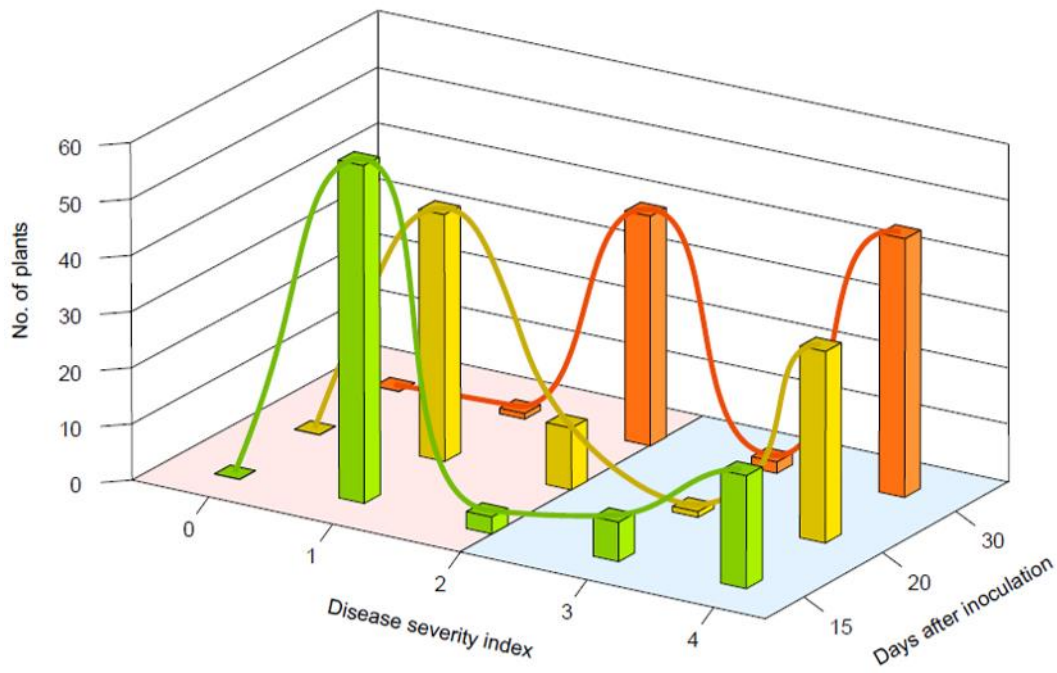

474 **Figure 6.** Histograms and curve graphs represented the number of plants' phenotype  
475 segregation based on disease severity scores of the F<sub>2</sub> population (n=90) at 15 (green bar),  
476 20 (yellow bar), and 30 dai (orange bar). The plants were inoculated with *R. solanacearum*  
477 strain SL1931, the bacterial suspensions are 1 x 10<sup>6</sup> CFU/ml to give inoculum volume of 0.1  
478 mL/leaf at fully expanded 3rd and 4th leaf stages in a plant. The red zone and blue zone  
479 represented resistance and susceptible, respectively.

## 480 References

- 481 1. Howard, L. R.; Wildman, R. E., Antioxidant vitamin and phytochemical content of fresh and  
482 processed pepper fruit (*Capsicum annuum*). *Handbook of nutraceuticals and functional*  
483 *foods*. Boca Raton, **2007**, pp. 165-191.
- 484 2. Faostat 2020. Available online: <http://www.fao.org/> (accessed on 22 October 2020).
- 485 3. UN Comtrade Database. Available online: <http://comtrade.un.org/> (accessed on 15  
486 October 2020).
- 487 4. Common Names of Plant Disease. Available online :  
488 <https://www.apsnet.org/edcenter/resources/commonnames/Pages/default.aspx> (accessed  
489 on 24 October 2020).
- 490 5. Mansfield, J.; Genin, S.; Magori, S.; Citovsky, V.; Sriariyanum, M.; Ronald, P.; Dow, M.; Verdier,  
491 V.; Beer, S. V.; Machado, M. A., Top 10 plant pathogenic bacteria in molecular plant  
492 pathology. *Molecular plant pathology* **2012**, 13, 614-629.
- 493 6. Jeong, Y.; Kim, J.; Kang, Y.; Lee, S.; Hwang, I., Genetic diversity and distribution of Korean  
494 isolates of *Ralstonia solanacearum*. *Plant Disease* **2007**, 91, 1277-1287.
- 495 7. Lee, Y. K.; Kang, H. W., Physiological, biochemical and genetic characteristics of *Ralstonia*  
496 *solanacearum* strains isolated from pepper plants in Korea. *Research in Plant Disease*  
497 **2013**, 19, 265-272.
- 498 8. Jiang, G.; Peyraud, R.; Remigi, P.; Guidot, A.; Ding, W.; Genin, S.; Peeters, N., Modeling and  
499 experimental determination of infection bottleneck and within-host dynamics of a soil-  
500 borne bacterial plant pathogen. *bioRxiv* **2016**, 061408.
- 501 9. Jiang, G.; Wei, Z.; Xu, J.; Chen, H.; Zhang, Y.; She, X.; Macho, A. P.; Ding, W.; Liao, B.,  
502 Bacterial wilt in China: history, current status, and future perspectives. *Frontiers in Plant*  
503 *Science* **2017**, 8, 1549.
- 504 10. Hayward, A., Biology and epidemiology of bacterial wilt caused by *Pseudomonas*  
505 *solanacearum*. *Annual review of phytopathology* **1991**, 29, 65-87.
- 506 11. Guidot, A.; Prior, P.; Schoenfeld, J.; Carrere, S.; Genin, S.; Boucher, C., Genomic structure and  
507 phylogeny of the plant pathogen *Ralstonia solanacearum* inferred from gene distribution  
508 analysis. *Journal of bacteriology* **2007**, 189, 377-387.
- 509 12. Prior, P.; Ailloud, F.; Dalsing, B. L.; Remenant, B.; Sanchez, B.; Allen, C., Genomic and  
510 proteomic evidence supporting the division of the plant pathogen *Ralstonia solanacearum*  
511 into three species. *BMC genomics* **2016**, 17, 90.
- 512 13. Safni, I.; Cleenwerck, I.; De Vos, P.; Fegan, M.; Sly, L.; Kappler, U., Polyphasic taxonomic  
513 revision of the *Ralstonia solanacearum* species complex: proposal to emend the  
514 descriptions of *Ralstonia solanacearum* and *Ralstonia syzygii* and reclassify current *R.*

- 515 *syzygii* strains as *Ralstonia syzygii* subsp. *syzygii* subsp. nov., *R. solanacearum* phylotype IV  
516 strains as *Ralstonia syzygii* subsp. *indonesiensis* subsp. nov., banana blood disease  
517 bacterium strains as *Ralstonia syzygii* subsp. *celebesensis* subsp. nov. and *R. solanacearum*  
518 phylotype I and III strains as *Ralstonia pseudosolanacearum* sp. nov. *International journal*  
519 *of systematic and evolutionary microbiology* **2014**, 64, 3087-3103.
- 520 14. Vasse, J.; Frey, P.; Trigalet, A., Microscopic studies of intercellular infection and protoxylem  
521 invasion of tomato roots by *Pseudomonas solanacearum*. *Molecular Plant-Microbe*  
522 *Interactions* **1995**, 8, 241-251.
- 523 15. Hwang, S. M.; Jang, K. S.; Choi, Y. H.; Kim, H.; Choi, G. J., Development of an Efficient  
524 Bioassay Method to Evaluate Resistance of Chili Pepper Cultivars to *Ralstonia*  
525 *solanacearum*. *Research in Plant Disease* **2017**, 23, 334-347.
- 526 16. Lee, J.; Lee, J.; Oh, D., Resistance of pepper cultivars to *Ralstonia solanacearum* isolates  
527 from major cultivated areas of chili peppers in Korea. *Horticultural Science and Technology*  
528 **2018**, 36, 569-576.
- 529 17. Lee, H. J.; Jo, E. J.; Kim, N. H.; Chae, Y.; Lee, S. W., Disease responses of tomato pure lines  
530 against *Ralstonia solanacearum* strains from Korea and susceptibility at high temperature.  
531 *Research in Plant Disease* **2011**, 17, 326-333.
- 532 18. Jung, E. J.; Joo, H. J.; Choi, S. Y.; Lee, S. Y.; Jung, Y. H.; Lee, M. H.; Kong, H. G.; Lee, S. W.,  
533 Resistance evaluation of tomato germplasm against bacterial wilt by *Ralstonia*  
534 *solanacearum*. *Research in Plant Disease* **2014**, 20, 253-258.
- 535 19. Fonseca, N. R.; Oliveira, L. S.; Guimarães, L. M.; Teixeira, R. U.; Lopes, C. A.; Alfnas, A. C.,  
536 An efficient inoculation method of *Ralstonia solanacearum* to test wilt resistance in  
537 Eucalyptus spp. *Tropical Plant Pathology* **2016**, 41, 42-47.
- 538 20. Huet, G., Breeding for resistances to *Ralstonia solanacearum*. *Frontiers in plant science*  
539 **2014**, 5, 715.
- 540 21. Lee, S. M.; Kwak, Y. S.; Lee, K. H.; Kim, H. T., Control efficacy of fungicides on pepper  
541 bacterial wilt. *The Korean Journal of Pesticide Science* **2015**, 19, 323-328.
- 542 22. Lopes, C. A.; Boiteux, L. S., Biovar-specific and broad-spectrum sources of resistance to  
543 bacterial wilt (*Ralstonia solanacearum*) in *Capsicum*. *Embrapa Hortaliças-Artigo em*  
544 *periódico indexado (ALICE)* **2004**.
- 545 23. Mimura, Y.; Yoshikawa, M.; Hirai, M., Pepper accession LS2341 is highly resistant to  
546 *Ralstonia solanacearum* strains from Japan. *HortScience* **2009**, 44, 2038-2040.
- 547 24. Tran, N. H.; Kim, B. S., Sources of resistance to bacterial wilt found in Vietnam collections  
548 of pepper (*Capsicum annuum*) and their nuclear fertility restorer genotypes for  
549 cytoplasmic male sterility. *Plant Pathol. J* **2012**, 28, 418-422.

- 550 25. Matsunaga, H.; Sato, T.; Monma, S. In Inheritance of bacterial wilt resistance in the sweet  
551 pepper cv. Mie-Midori. In Proceeding of the 10th Eucarpia Meeting on Genetics and  
552 Breeding of Capsicum and Eggplant, Avignon, France, 7-11 Sep 1998; p. 172.
- 553 26. Lafortune, D.; Béramis, M.; Daubèze, A. M.; Boissot, N.; Palloix, A., Partial resistance of  
554 pepper to bacterial wilt is oligogenic and stable under tropical conditions. *Plant Disease*  
555 **2005**, 89, 501-506.
- 556 27. Mimura, Y.; Kageyama, T.; Minamiyama, Y.; Hirai, M., QTL analysis for resistance to *Ralstonia*  
557 *solanacearum* in *Capsicum* accession 'LS2341'. *Journal of the Japanese Society for*  
558 *Horticultural Science* **2009**, 78, 307-313.
- 559 28. Du, H.; Wen, C.; Zhang, X.; Xu, X.; Yang, J.; Chen, B.; Geng, S., Identification of a major QTL  
560 (*qRRs-10.1*) that confers resistance to *Ralstonia solanacearum* in pepper (*Capsicum*  
561 *annuum*) using SLAF-BSA and QTL mapping. *International journal of molecular sciences*  
562 **2019**, 20, 5887.
- 563 29. Lebeau, A.; Daunay, M. C.; Frary, A.; Palloix, A.; Wang, J. F.; Dintinger, J.; Chiroleu, F.; Wicker,  
564 E.; Prior, P., Bacterial wilt resistance in tomato, pepper, and eggplant: genetic resources  
565 respond to diverse strains in the *Ralstonia solanacearum* species complex. *Phytopathology*  
566 **2011**, 101, 154-165.
- 567 30. Kim, B.; Cheung, J.; Cha, Y.; Hwang, H. Resistance to bacterial wilt of introduced peppers.  
568 **1998**, 14, 217-219
- 569 31. Yi, S. Y.; Lee, D. J.; Yeom, S. I.; Yoon, J.; Kim, Y. H.; Kwon, S. Y.; Choi, D., A novel pepper  
570 (*Capsicum annuum*) receptor-like kinase functions as a negative regulator of plant cell  
571 death via accumulation of superoxide anions. *New Phytol* **2010**, 185, 701-15.
- 572 32. Simko, I.; Piepho, H. P., The area under the disease progress stairs: calculation, advantage,  
573 and application. *Phytopathology* **2012**, 102, 381-389.
- 574 33. Yeom, S. I.; Baek, H. K.; Oh, S. K.; Kang, W. H.; Lee, S. J.; Lee, J. M.; Seo, E.; Rose, J. K.; Kim,  
575 B. D.; Choi, D., Use of a secretion trap screen in pepper following *Phytophthora capsici*  
576 infection reveals novel functions of secreted plant proteins in modulating cell death.  
577 *Molecular plant-microbe interactions* **2011**, 24, 671-684.
- 578 34. Huh, S. U.; Kim, K. J.; Paek, K. H., *Capsicum annuum* basic transcription factor 3 (*CaBtf3*)  
579 regulates transcription of pathogenesis-related genes during hypersensitive response upon  
580 *Tobacco mosaic virus* infection. *Biochemical and biophysical research communications*  
581 **2012**, 417, 910-917.
- 582 35. Hamada, H.; Takeuchi, S.; Kiba, A.; Tsuda, S.; Suzuki, K.; Hikichi, Y.; Okuno, T., Timing and  
583 extent of hypersensitive response are critical to restrict local and systemic spread of

- 584 *Pepper mild mottle virus* in pepper containing the *L3* gene. *Journal of General Plant*  
585 *Pathology* **2005**, 71, 90-94.
- 586 36. Kim, B.; Hwang, I. S.; Lee, H. J.; Lee, J. M.; Seo, E.; Choi, D.; Oh, C. S., Identification of a  
587 molecular marker tightly linked to bacterial wilt resistance in tomato by genome-wide SNP  
588 analysis. *Theoretical and Applied Genetics* **2018**, 131, 1017-1030.
- 589 37. Lee, J. H.; Jang, K. S.; Choi, Y. H.; Kim, J. C.; Choi, G. J., Development of an efficient  
590 screening system for resistance of tomato cultivars to *Ralstonia solanacearum*. *Research in*  
591 *Plant Disease* **2015**, 21, 290-296.
- 592 38. Bocsanczy, A. M.; Achenbach, U. C.; Mangravita N, A.; Yuen, J. M.; Norman, D. J.,  
593 Comparative effect of low temperature on virulence and twitching motility of *Ralstonia*  
594 *solanacearum* strains present in Florida. *Phytopathology* **2012**, 102, 185-194.
- 595 39. Deslandes, L.; Pileur, F.; Liaubet, L.; Camut, S.; Can, C.; Williams, K.; Holub, E.; Beynon, J.;  
596 Arlat, M.; Marco, Y., Genetic characterization of *RRS1*, a recessive locus in *Arabidopsis*  
597 *thaliana* that confers resistance to the bacterial soilborne pathogen *Ralstonia*  
598 *solanacearum*. *Molecular Plant-Microbe Interactions* **1998**, 11, 659-667.
- 599 40. Aoun, N.; Tauleigne, L.; Lonjon, F.; Deslandes, L.; Vaillau, F.; Roux, F.; Berthomé, R.,  
600 Quantitative disease resistance under elevated temperature: genetic basis of new  
601 resistance mechanisms to *Ralstonia solanacearum*. *Frontiers in plant science* **2017**, 8, 1387.
- 602 41. Lebeau, A.; Gouy, M.; Daunay, M. C.; Wicker, E.; Chiroleu, F.; Prior, P.; Frary, A.; Dintinger, J.,  
603 Genetic mapping of a major dominant gene for resistance to *Ralstonia solanacearum* in  
604 eggplant. *Theoretical and Applied Genetics* **2013**, 126, 143-158.
- 605 42. Cruz, A. P. Z.; Ferreira, V.; Pianzola, M. J.; Siri, M. I.; Coll, N. S.; Valls, M., A novel, sensitive  
606 method to evaluate potato germplasm for bacterial wilt resistance using a luminescent  
607 *Ralstonia solanacearum* reporter strain. *Molecular Plant-Microbe Interactions* **2014**, 27,  
608 277-285.
- 609 43. Wang, K.; Remigi, P.; Anisimova, M.; Lonjon, F.; Kars, I.; Kajava, A.; Li, C. H.; Cheng, C. P.;  
610 Vaillau, F.; Genin, S., Functional assignment to positively selected sites in the core type III  
611 effector *RipG7* from *Ralstonia solanacearum*. *Molecular plant pathology* **2016**, 17, 553-564.
- 612 44. Pontier, D.; Godiard, L.; Marco, Y.; Roby, D., *Hsr203J*, a tobacco gene whose activation is  
613 rapid, highly localized and specific for incompatible plant/pathogen interactions. *Plant J*  
614 **1994**, 5, 507-21.
- 615 45. Kiba, A.; Maimbo, M.; Kanda, A.; Tomiyama, H.; Ohnishi, K.; Hikichi, Y., Isolation and  
616 expression analysis of candidate genes related to *Ralstonia solanacearum*-tobacco  
617 interaction. *Plant Biotechnology* **2007**, 24, 409-416.



- 618 46. Nakano, M.; Nishihara, M.; Yoshioka, H.; Takahashi, H.; Sawasaki, T.; Ohnishi, K.; Hikichi, Y.;  
619 Kiba, A., Suppression of *DS1* phosphatidic acid phosphatase confirms resistance to  
620 *Ralstonia solanacearum* in *Nicotiana benthamiana*. *PLoS One* **2013**, *8*, e75124.
- 621 47. Planas M. M.; Bernardo F. M.; Paulus, J.; Kaschani, F.; Kaiser, M.; Valls, M.; van der Hoorn, R.  
622 A.; Coll, N. S., Protease activities triggered by *Ralstonia solanacearum* infection in  
623 susceptible and tolerant tomato lines. *Molecular & Cellular Proteomics* **2018**, *17*, 1112-  
624 1125.
- 625 48. Janse, J.; Van den Beld, H.; Elphinstone, J.; Simpkins, S.; Tjou-Tam-Sin, N.; Van Vaerenbergh,  
626 J., Introduction to Europe of *Ralstonia solanacearum* biovar 2, race 3 in *Pelargonium*  
627 *zonale* cuttings. *Journal of Plant Pathology* **2004**, 147-155.
- 628 49. Singh, D.; Yadav, D.; Sinha, S.; Choudhary, G., Effect of temperature, cultivars, injury of root  
629 and inoculums load of *Ralstonia solanacearum* to cause bacterial wilt of tomato. *Archives*  
630 *of Phytopathology and Plant Protection* **2014**, *47*, 1574-1583.
- 631 50. Caranta, C.; Palloix, A., Both common and specific genetic factors are involved in polygenic  
632 resistance of pepper to several *potyviruses*. *Theoretical and Applied Genetics* **1996**, *92*,  
633 15-20.
- 634 51. Thabuis, A.; Palloix, A.; Pflieger, S.; Daubeze, A. M.; Caranta, C.; Lefebvre, V., Comparative  
635 mapping of *Phytophthora* resistance loci in pepper germplasm: evidence for conserved  
636 resistance loci across Solanaceae and for a large genetic diversity. *Theoretical and Applied*  
637 *Genetics* **2003**, *106*, 1473-1485.
- 638 52. Tran, N. H.; Kim, B. S., Inheritance of resistance to bacterial wilt (*Ralstonia solanacearum*) in  
639 pepper (*Capsicum annuum* L.). *HORTICULTURE ENVIRONMENT and BIOTECHNOLOGY*  
640 **2010**, *51*, 431-439.
- 641 53. Kim, H. J.; Baek, K. H.; Lee, S. W.; Kim, J.; Lee, B. W.; Cho, H. S.; Kim, W. T.; Choi, D.; Hur, C.  
642 G., Pepper EST database: comprehensive in silico tool for analyzing the chili pepper  
643 (*Capsicum annuum*) transcriptome. *BMC Plant Biology* **2008**, *8*, 1-7.
- 644 54. Mateos, R. M.; Bonilla V., D.; Del Río, L. A.; Palma, J. M.; Corpas, F. J., *NADP*-dehydrogenases  
645 from pepper fruits: effect of maturation. *Physiologia Plantarum* **2009**, *135*, 130-139.
